# Supplementary material
Source: publisher site journal article supplement (https://www.dovepress.com/article/supplementary_file/610904/610904%20Revised%20Supplementary%20Material.docx)
Supplement: Supplementary file 1 [file 610904%20Revised%20Supplementary%20Material.docx]

Supplementary Table S1 The prevalence of 19 allergens in the routine medical examination population (N=18,777)

| **Allergen** | **Number of sensitized participants** | **Sensitization rate** |
| --- | --- | --- |
| at least one allergen | 4580 | 24.39% |
| Inhalant allergens | 4067 | 21.66% |
| House dust mite mix | 3322 | 17.69% |
| Cat dander | 551 | 2.93% |
| Cockroach | 503 | 2.68% |
| Tree mix | 291 | 1.55% |
| Mugwort | 196 | 1.04% |
| Common ragweed | 192 | 1.02% |
| Dog epithelium | 191 | 1.02% |
| House dust | 133 | 0.71% |
| Hop | 109 | 0.58% |
| Mould mix | 100 | 0.53% |
| Food allergens | 1263 | 6.73% |
| Crab | 649 | 3.46% |
| Sea fish mix | 207 | 1.10% |
| Soybean | 178 | 0.95% |
| Egg white | 162 | 0.86% |
| Mutton | 157 | 0.84% |
| Shrimp | 123 | 0.66% |
| Peanut | 105 | 0.56% |
| Beef | 45 | 0.24% |
| Cow's milk | 39 | 0.21% |

Supplementary Table S2 Comparison of allergen sensitization rates by gender in study population

| **Allergen (*n*, %)** | **Male （N = 9,310）** | **Female （N = 9,467）** | ***P* value** | ***OR* (95% *CI*)#** |
| --- | --- | --- | --- | --- |
| Inhalant allergens | 2,174 (23.35) | 1,893 (20.00) | <0.001 | / |
| House dust mite mix | 1,734 (18.63) | 1588 (16.77) | <0.001 | 1.149 (1.065-1.241) |
| Cockroach | 331 (3.56) | 172 (1.82) | <0.001 | 1.997 (1.657-2.406) |
| Cat dander | 280 (3.01) | 271 (2.86) | 0.45 | 1.069 (0.900-1.269) |
| Tree mix | 190 (2.04) | 101 (1.07) | <0.001 | 1.932 (1.515-2.463) |
| Common ragweed | 128 (1.37) | 64 (0.68) | <0.001 | 2.048 (1.515-2.769) |
| Mugwort | 120 (1.29) | 76 (0.80) | 0.001 | 1.616 (1.211-2.157) |
| Hop | 75 (0.81) | 34 (0.36) | <0.001 | 2.254 (1.501-3.384) |
| Dog epithelium | 73 (0.78) | 118 (1.25) | 0.002 | 0.632 (0.471-0.848) |
| House dust | 67 (0.72) | 66 (0.70) | 0.806 | 1.044 (0.742-1.469) |
| Mould mix | 61 (0.66) | 39 (0.41) | 0.021 | 1.607 (1.074-2.404) |
| Food allergens | 672 (7.22) | 591 (6.24) | 0.008 | / |
| Crab | 410 (4.40) | 239 (2.52) | <0.001 | 1.782 (1.515-2.096) |
| Sea fish mix | 119 (1.28) | 88 (0.93) | 0.022 | 1.382 (1.047-1.823) |
| Soybean | 83 (0.89) | 95 (1.00) | 0.422 | 0.886 (0.659-1.191) |
| Shrimp | 79 (0.85) | 44 (0.46) | 0.001 | 1.840 (1.271-2.663) |
| Peanut | 72 (0.77) | 33 (0.35) | <0.001 | 2.224 (1.472-3.362) |
| Egg white | 66 (0.71) | 96 (1.01) | 0.024 | 0.696 (0.508-0.953) |
| Mutton | 50 (0.54) | 107 (1.13) | <0.001 | 0.474 (0.338-0.664) |
| Beef | 14 (0.15) | 31 (0.33) | 0.017 | 0.462 (0.246-0.870) |
| Cow's milk | 12 (0.13) | 27 (0.29) | 0.024 | 0.455 (0.230-0.900) |

*OR* means odds ratio.
*CI* means confidence interval.
# means adjusted *OR* adjusted for age and season and reference group for all *OR*s is female sex.

| **Allergen (*n*, %)** | **<20 years (N=157）** | **20-29 years (N=1,883）** | **30-39 years (N=5,322）** | **40-49 years (N=5,528）** | **50-59 years (N=3,973）** | **≥60 years (N=1,914）** | ***χ*2** | ***P* value** |
| --- | --- | --- | --- | --- | --- | --- | --- | --- |
| Inhalant allergens | 81 (51.59) | 727 (38.61) | 1358 (25.52) | 1068 (19.32) | 615 (15.48) | 218 (11.39) | 674.59 | <0.001 |
| Food allergens | 16 (10.19) | 145 (7.70) | 372 (6.99) | 324 (5.86) | 257 (6.47) | 149 (7.78) | 16.88 | 0.005 |
| House dust mite mix | 73 (46.50) | 618 (32.82) | 1144 (21.50) | 872 (15.77) | 464 (11.68) | 151 (7.89) | 677.19 | <0.001 |
| Common ragweed | 1 (0.64) | 16 (0.85) | 53 (1.00) | 46 (0.83) | 48 (1.21) | 28 (1.46) | 7.82 | 0.166 |
| Mugwort | 1 (0.64) | 28 (1.49) | 56 (1.05) | 49 (0.89) | 40 (1.01) | 22 (1.15) | 5.42 | 0.367 |
| Hop | 0 (0) | 8 (0.42) | 35 (0.66) | 24 (0.43) | 27 (0.68) | 15 (0.78) | 6.35 | 0.273 |
| Peanut | 0 (0) | 7 (0.37) | 23 (0.43) | 26 (0.47) | 27 (0.68) | 22 (1.15) | 17.43 | 0.004 |
| Soybean | 0 (0) | 8 (0.42) | 41 (0.77) | 61 (1.10) | 41 (1.03) | 27 (1.41) | 14.86 | 0.011 |
| Shrimp | 7 (4.46) | 18 (0.96) | 33 (0.62) | 27 (0.49) | 28 (0.70) | 10 (0.52) | 40.65 | <0.001 |
| Sea fish mix | 8 (5.10) | 20 (1.06) | 51 (0.96) | 56 (1.01) | 51 (1.28) | 21 (1.10) | 25.61 | <0.001 |
| House dust | 3 (1.91) | 37 (1.96) | 56 (1.05) | 18 (0.33) | 15 (0.38) | 4 (0.21) | 78.94 | <0.001 |
| Cat dander | 16 (10.19) | 194 (10.30) | 220 (4.13) | 74 (1.34) | 41 (1.03) | 6 (0.31) | 560.89 | <0.001 |
| Dog epithelium | 3 (1.91) | 60 (3.19) | 82 (1.54) | 16 (0.29) | 28 (0.70) | 2 (0.10) | 152.50 | <0.001 |
| Cow's milk | 1 (0.64) | 13 (0.69) | 16 (0.30) | 4 (0.07) | 2 (0.05) | 3 (0.16) | 34.65 | <0.001 |
| Beef | 1 (0.64) | 15 (0.80) | 17 (0.32) | 1 (0.02) | 4 (0.10) | 7 (0.37) | 42.72 | <0.001 |
| Mutton | 1 (0.64) | 35 (1.86) | 53 (1.00) | 25 (0.45) | 23 (0.58) | 20 (1.04) | 39.46 | <0.001 |
| Tree mix 2 | 6 (3.82) | 23 (1.22) | 79 (1.48) | 73 (1.32) | 67 (1.69) | 43 (2.25) | 15.27 | 0.009 |
| Cockroach | 7 (4.46) | 56 (2.97) | 152 (2.86) | 146 (2.64) | 95 (2.39) | 47 (2.46) | 4.84 | 0.436 |
| Crab | 10 (6.37) | 82 (4.35) | 204 (3.83) | 167 (3.02) | 121 (3.05) | 65 (3.40) | 15.98 | 0.007 |
| Egg white | 3 (1.91) | 15 (0.80) | 50 (0.94) | 30 (0.54) | 41 (1.03) | 23 (1.20) | 13.00 | 0.023 |
| Mould mix | 1 (0.64) | 21 (1.12) | 38 (0.71) | 23 (0.42) | 10 (0.25) | 7 (0.37) | 23.75 | <0.001 |

Supplementary Table S3 The sensitization rates of individual allergens across different age groups

| **Allergen (*n*, %)** | **Class 1** | **Class 2** | **Class 3** | **Class 4** | **Class 5** | **Class 6** |
| --- | --- | --- | --- | --- | --- | --- |
| Dog epithelium | 20 (10.5) | 65 (34) | 44 (23) | 43 (22.5) | 19 (10) | 0 (0) |
| Peanut | 74 (70.5) | 27 (25.7) | 4 (3.8) | 0 (0) | 0 (0) | 0 (0) |
| Egg white | 106 (65.4) | 50 (30.9) | 6 (3.7) | 0 (0) | 0 (0) | 0 (0) |
| Hop | 68 (62.4) | 31 (28.4) | 9 (8.3) | 1 (0.9) | 0 (0) | 0 (0) |
| Mould mix | 69 (69) | 24 (24) | 7 (7) | 0 (0) | 0 (0) | 0 (0) |
| Beef | 31 (68.9) | 9 (20) | 4 (8.9) | 1 (0.9) | 0 (0) | 0 (0) |
| House dust | 82 (61.7) | 39 (29.3) | 11 (8.3) | 1 (0.8) | 0 (0) | 0 (0) |
| Shrimp | 52 (42.3) | 40 (32.5) | 15 (12.2) | 11 (8.9) | 5 (4.1) | 0 (0) |
| Mutton | 93 (59.2) | 31 (19.8) | 12 (7.6) | 16 (10.2) | 5 (3.2) | 0 (0) |
| Mugwort | 74 (37.8) | 66 (33.7) | 29 (14.8) | 15 (7.7) | 12 (6.1) | 0 (0) |
| Sea fish mix | 124 (59.9) | 52 (25.1) | 18 (8.7) | 7 (3.4) | 6 (2.9) | 0 (0) |
| Soybean | 97 (54.5) | 61 (34.3) | 15 (8.4) | 3 (1.7) | 2 (1.1) | 0 (0) |
| Tree mix | 153 (52.6) | 105 (36.1) | 26 (8.9) | 5 (1.7) | 2 (0.7) | 0 (0) |
| Cat dander | 140 (25.4) | 169 (30.7) | 95 (17.2) | 100 (18.2) | 47 (8.5) | 0 (0) |
| Cow's milk | 19 (48.7) | 14 (35.9) | 4 (10.3) | 2 (5.1) | 0 (0) | 0 (0) |
| Common ragweed | 106 (55.2) | 61 (31.8) | 20 (10.4) | 4 (2.1) | 1 (0.5) | 0 (0) |
| House dust mite mix | 442 (13.3) | 655 (19.7) | 705 (21.2) | 973 (29.3) | 541 (16.3) | 6 (0.2) |
| Crab | 317 (48.8) | 207 (31.9) | 74 (11.4) | 35 (5.4) | 16 (2.5) | 0 (0) |
| Cockroach | 295 (58.7) | 172 (34.2) | 31 (6.2) | 5 (1) | 0 (0) | 0 (0) |

Supplementary Table S4 Distribution of slgE classification for the 19 allergens

| **Number of sensitized allergens** | **Number (*n*)** | **Percentage (%)** |
| --- | --- | --- |
| 1 | 3092 | 67.51 |
| 2 | 897 | 19.59 |
| 3 | 304 | 6.64 |
| 4 | 118 | 2.58 |
| 5 | 89 | 1.94 |
| 6 | 45 | 0.98 |
| 7 | 18 | 0.39 |
| 8 | 12 | 0.26 |
| 9 | 4 | 0.09 |
| 10 | 1 | 0.02 |
| 11-19 | 0 | 0 |

Supplementary Table S5 Distribution of the number of sensitized allergens

Supplementary Table S6 Pairwise comparison results of allergen sensitization rates among different seasons after Bonferroni correction.

|  | **Inhalant allergens** | | **Food allergens** | | **House dust mite mix** | | **Tree mix** | | **Common ragweed** | | **House dust** | | **Mutton** | |
| --- | --- | --- | --- | --- | --- | --- | --- | --- | --- | --- | --- | --- | --- | --- |
| **χ2** | ***P* value** | **χ2** | ***P* value** | **χ2** | ***P* value** | **χ2** | ***P* value** | **χ2** | ***P* value** | **χ2** | ***P* value** | **χ2** | ***P* value** |
| **Spring Summer** | 9.216 | 0.018* | 1.653 | 1.000 | 6.942 | 0.054 | 0.202 | 1.000 | 1.380 | 1.000 | 25.468 | 0.000* | 2.411 | 0.864 |
| **Spring Autumn** | 6.306 | 0.078 | 3.525 | 0.384 | 6.267 | 0.078 | 2.137 | 0.954 | 1.094 | 1.000 | 1.004 | 1.000 | 8.455 | 0.024* |
| **Spring Winter** | 1.964 | 0.978 | 0.659 | 1.000 | 5.653 | 0.114 | 4.258 | 0.282 | 3.632 | 0.414 | 1.706 | 1.000 | 0.891 | 1.000 |
| **Summer Autumn** | 0.212 | 1.000 | 0.359 | 1.000 | 0.007 | 1.000 | 0.990 | 1.000 | 0.011 | 1.000 | 15.070 | 0.001* | 1.825 | 1.000 |
| **Summer**  **Winter** | 2.275 | 0.810 | 4.034 | 0.276 | 0.031 | 1.000 | 5.967 | 0.090 | 8.666 | 0.018* | 12.546 | 0.002* | 5.562 | 0.114 |
| **Autumn  Winter** | 1.075 | 1.000 | 6.540 | 0.072 | 0.009 | 1.000 | 11.232 | 0.005* | 7.906 | 0.030* | 0.091 | 1.000 | 12.820 | 0.002* |

All *P* values were calculated after Bonferroni correction.

**P* values< 0.05 was considered statistically significant.


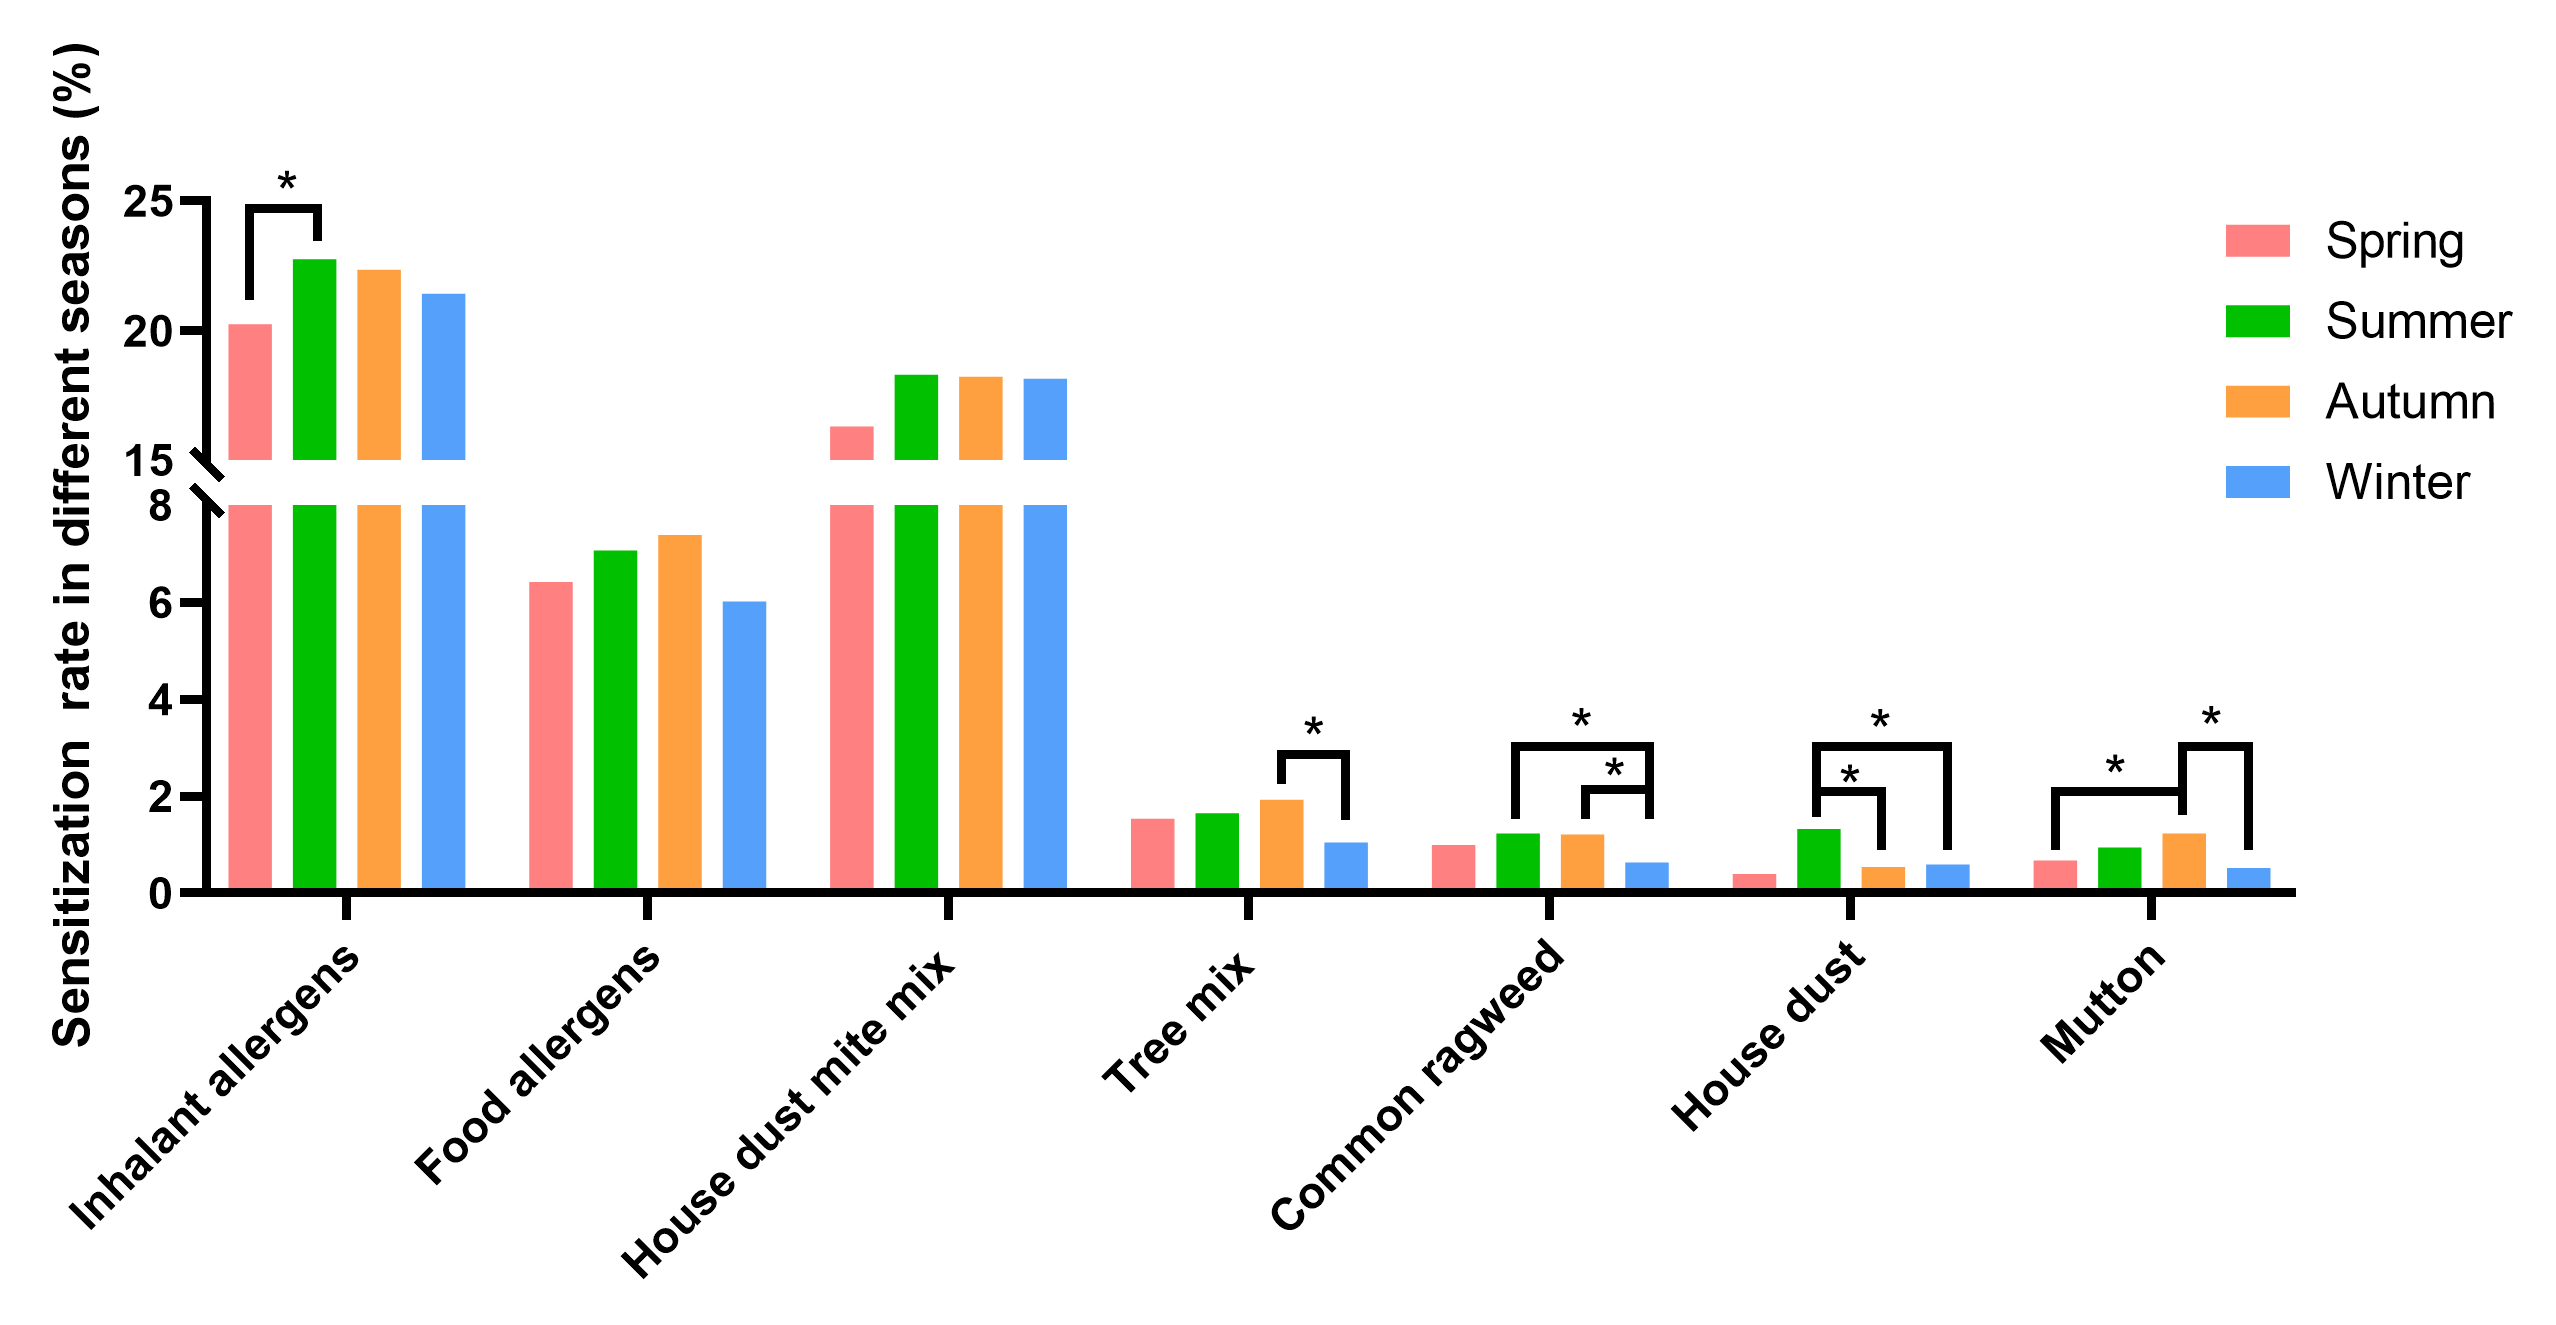


Supplementary Figure S1 Pairwise comparisons were conducted with Bonferroni correction to compare the differences in allergen sensitization levels across four seasons. *** was considered statistically significant.
